# Supplementary material for: Phytochemical Characterization of Cannabis sativa L. Chemotype V Reveals Three New Dihydrophenanthrenoids That Favorably Reprogram Lipid Mediator Biosynthesis in Macrophages
Source: MDPI journal article supplement (doi:10.3390/plants11162130), 2022-08-16
Supplement: s1 [file s1]

**Phytochemical characterization of *Cannabis sativa* L. chemotype V reveals three new dihydrophenanthrenoids that favourably reprogram lipid mediator biosynthesis in macrophages**

Stefano Salamone<sup>a,b,#</sup>, Lorenz Walth<sup>c,#</sup>, Anna Pompignan<sup>a</sup>, Gianpaolo Grassi<sup>d</sup>, Giuseppina Chianese<sup>e</sup>, Andreas Koeberle<sup>c\*</sup>, Federica Pollastro<sup>a,b\*</sup>

<sup>a</sup> Department of Pharmaceutical Sciences, University of Piemonte Orientale, 28100 Novara, Italy

<sup>b</sup> PlantaChem Srls, 28100 Novara, Italy

<sup>c</sup> Michael Popp Institute and Center for Molecular Biosciences Innsbruck (CMBI), University of Innsbruck, 6020 Innsbruck, Austria

<sup>d</sup> Canvasalus Srl, 35043 Monselice, Italy

<sup>e</sup> Department of Pharmacy, University of Naples Federico II, 80131 Naples, Italy

<sup>#</sup> Authors contributed equally

\* Correspondence: Andreas.Koeberle@uibk.ac.at, Tel.: +43 512 507-57903 federica.pollastro@uniupo.it, Tel.: +39 321 375 744

**SUPPORTING INFORMATION:**

**Figure S1.** <sup>1</sup>H NMR spectrum (400 MHz) of compound 5 in C<sub>3</sub>D<sub>6</sub>O.

**Figure S2.** <sup>13</sup>C NMR spectrum (100 MHz) of compound 5 in C<sub>3</sub>D<sub>6</sub>O.

**Figure S3.** HSQC 2D NMR spectrum (400 MHz) of compound 5 in C<sub>3</sub>D<sub>6</sub>O.

**Figure S4.** COSY 2D NMR spectrum (400 MHz) of compound 5 in C<sub>3</sub>D<sub>6</sub>O.

**Figure S5.** NOESY 2D NMR spectrum (400 MHz) of compound 5 in C<sub>3</sub>D<sub>6</sub>O.

**Figure S6.** HMBC 2D NMR spectrum (600 MHz) of compound 5 in C<sub>3</sub>D<sub>6</sub>O.

**Figure S7.** <sup>1</sup>H NMR spectrum (400 MHz) of compound 9 in C<sub>3</sub>D<sub>6</sub>O.

**Figure S8.** <sup>13</sup>C NMR spectrum (100MHz) of compound 9 in C<sub>3</sub>D<sub>6</sub>O.

**Figure S9.** HSQC 2D NMR spectrum (400 MHz) of compound 9 in C<sub>3</sub>D<sub>6</sub>O.

**Figure S10.** COSY 2D NMR spectrum (400 MHz) of compound 9 in C<sub>3</sub>D<sub>6</sub>O.

**Figure S11.** NOESY 2D NMR spectrum (600 MHz) of compound 9 in C<sub>3</sub>D<sub>6</sub>O.

**Figure S12.** HMBC spectrum (400 MHz) of compound 9 in C<sub>3</sub>D<sub>6</sub>O.

**Figure S13.** <sup>1</sup>H NMR spectrum (400 MHz) of compound 10 in C<sub>3</sub>D<sub>6</sub>O.

**Figure S14.** <sup>13</sup>C NMR spectrum (100MHz) of compound 10 in C<sub>3</sub>D<sub>6</sub>O.

**Figure S15.** HSQC 2D NMR spectrum (400 MHz) of compound 10 in C<sub>3</sub>D<sub>6</sub>O.

**Figure S16.** COSY 2D NMR spectrum (400 MHz) of compound 10 in C<sub>3</sub>D<sub>6</sub>O.

**Figure S17.** HMBC 2D NMR spectrum (600 MHz) of compound 10 in C<sub>3</sub>D<sub>6</sub>O.

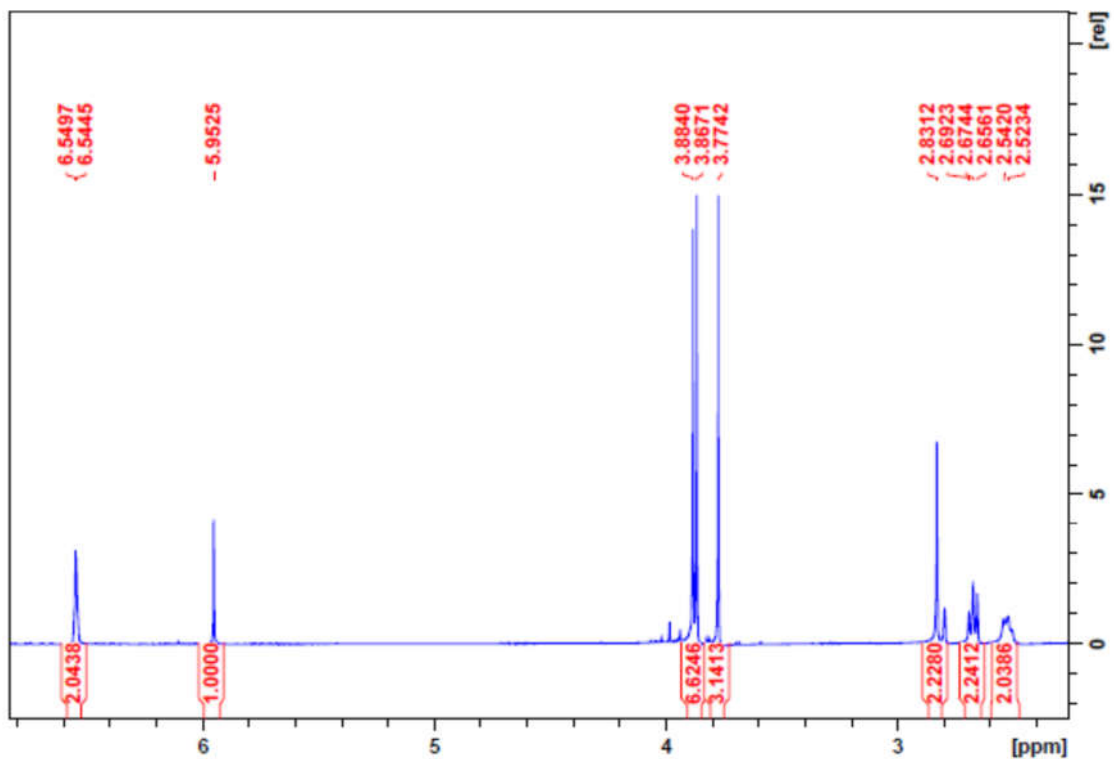

**Figure S1.** <sup>1</sup>H NMR spectrum (400 MHz) of compound 5 in C<sub>3</sub>D<sub>6</sub>O.

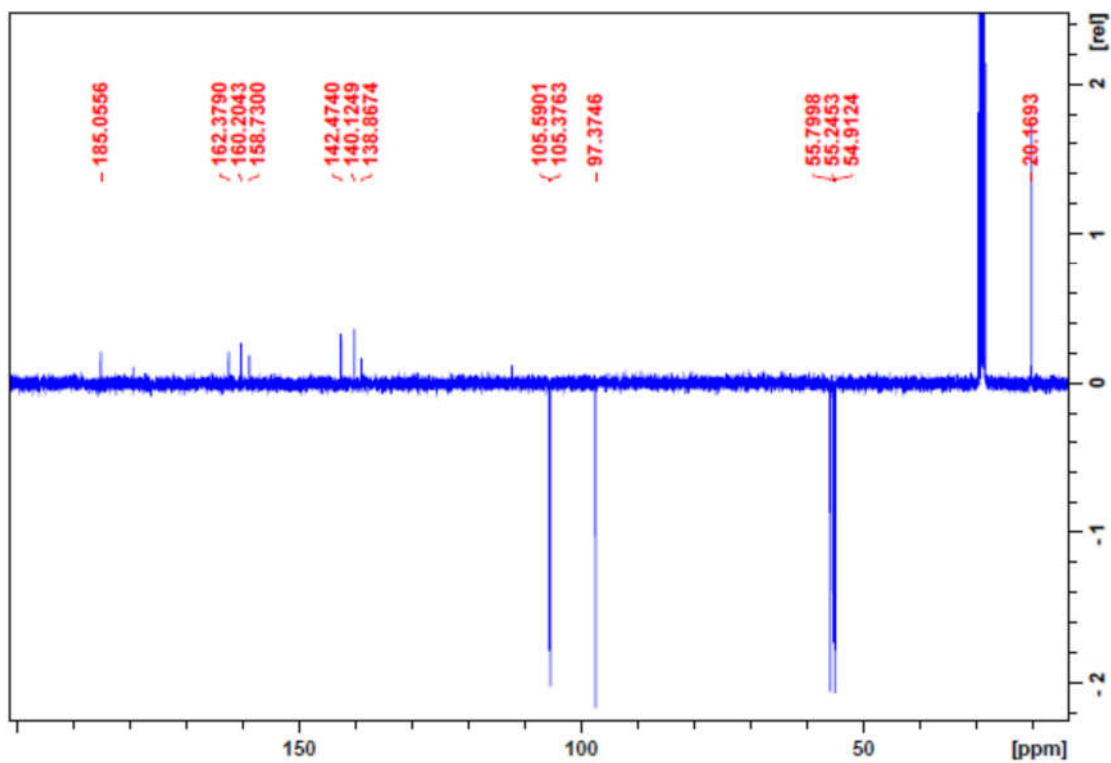

**Figure S2.** <sup>13</sup>C NMR spectrum (100 MHz) of compound 5 in C<sub>3</sub>D<sub>6</sub>O.

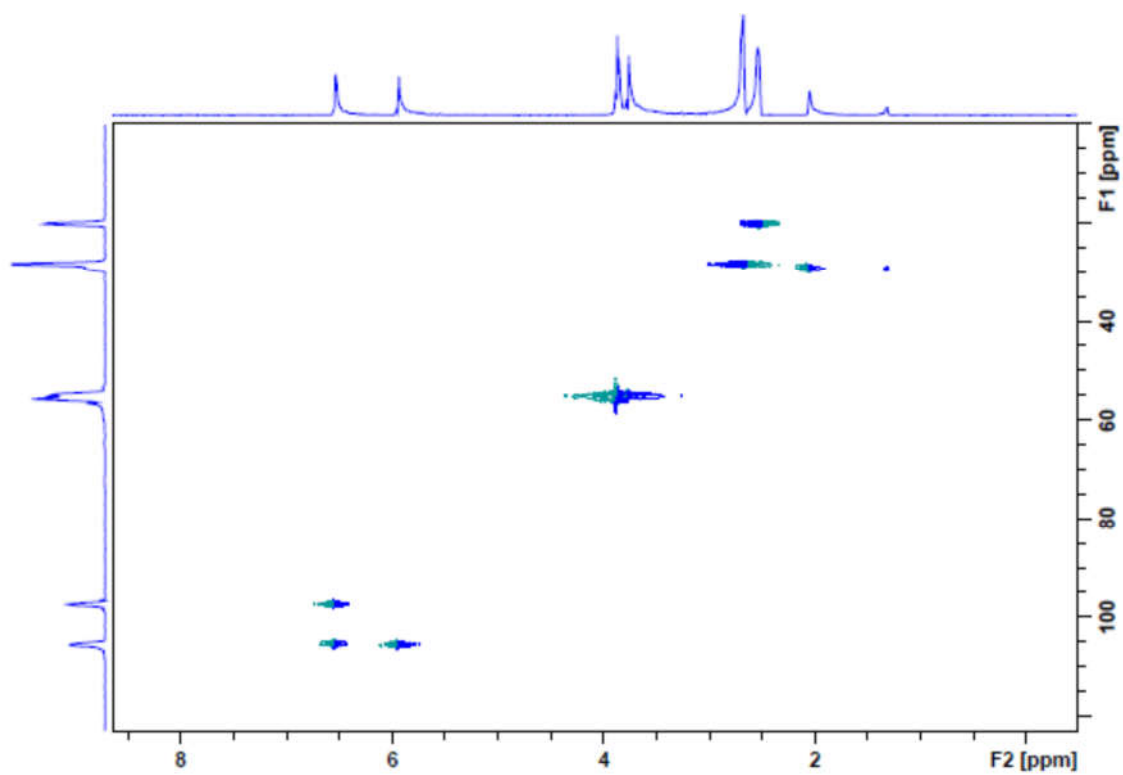

**Figure S3.** HSQC spectrum (400 MHz) of compound 5 in C<sub>3</sub>D<sub>6</sub>O.

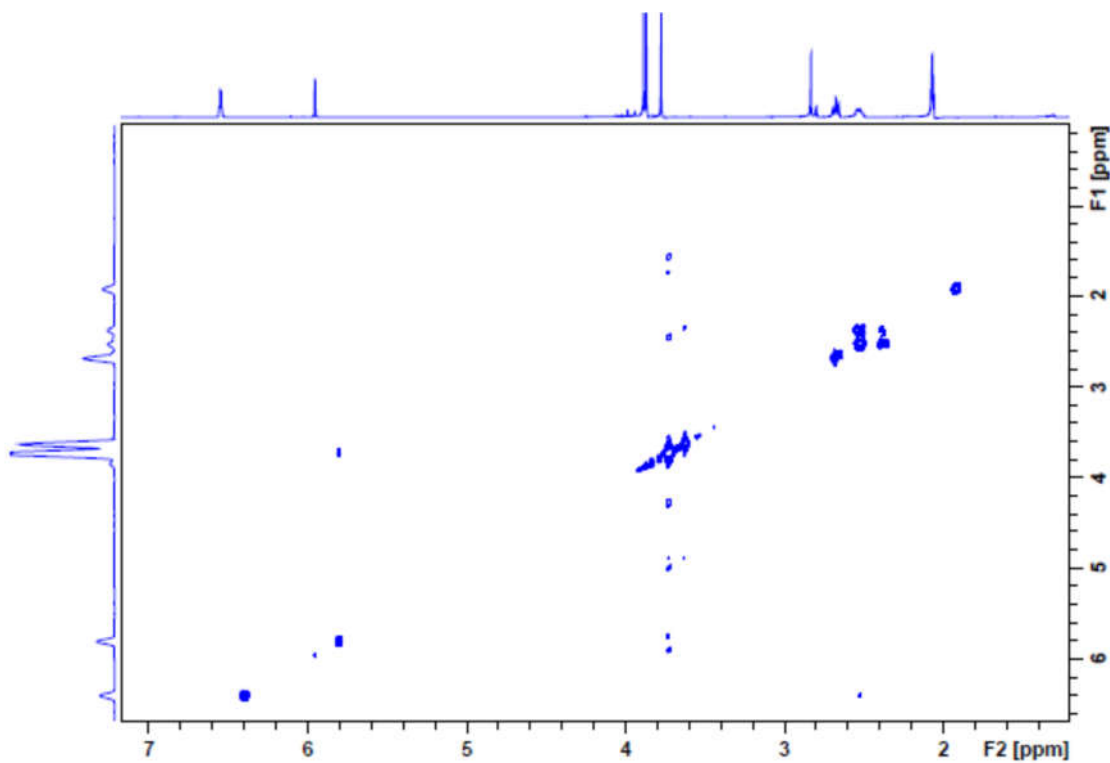

**Figure S4.** COSY spectrum (400 MHz) of compound 5 in C<sub>3</sub>D<sub>6</sub>O.

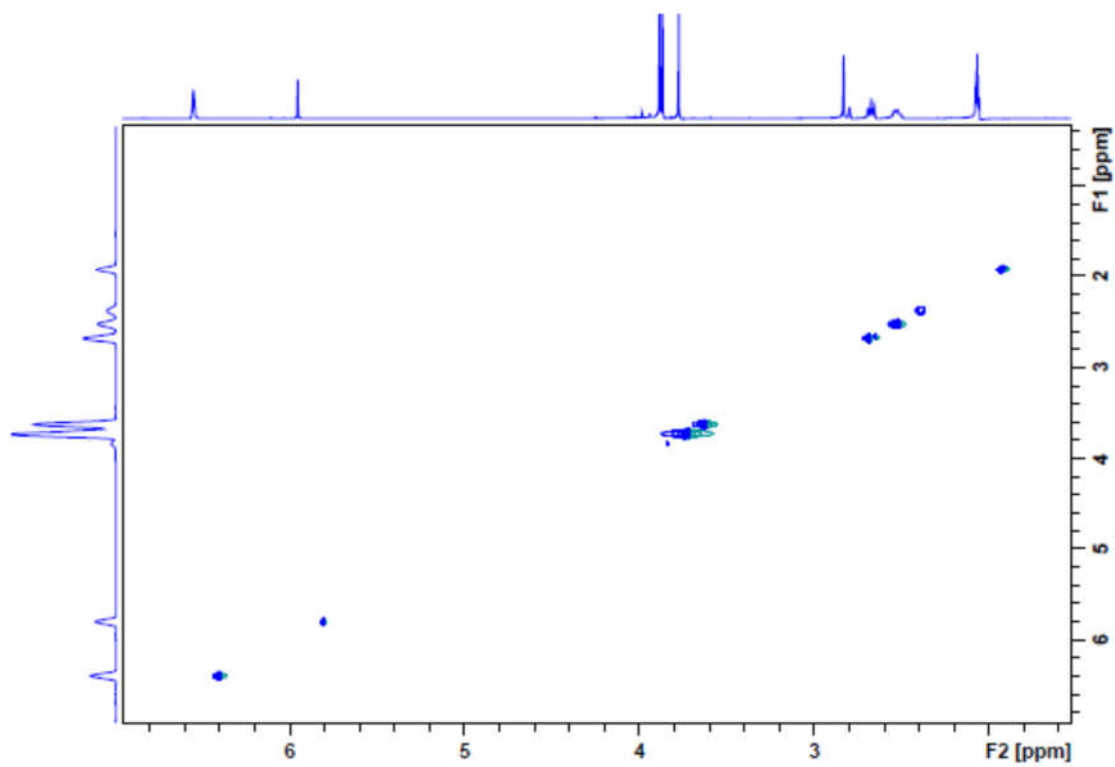

**Figure S5.** NOESY spectrum (400 MHz) of compound 5 in  $C_3D_6O$ .

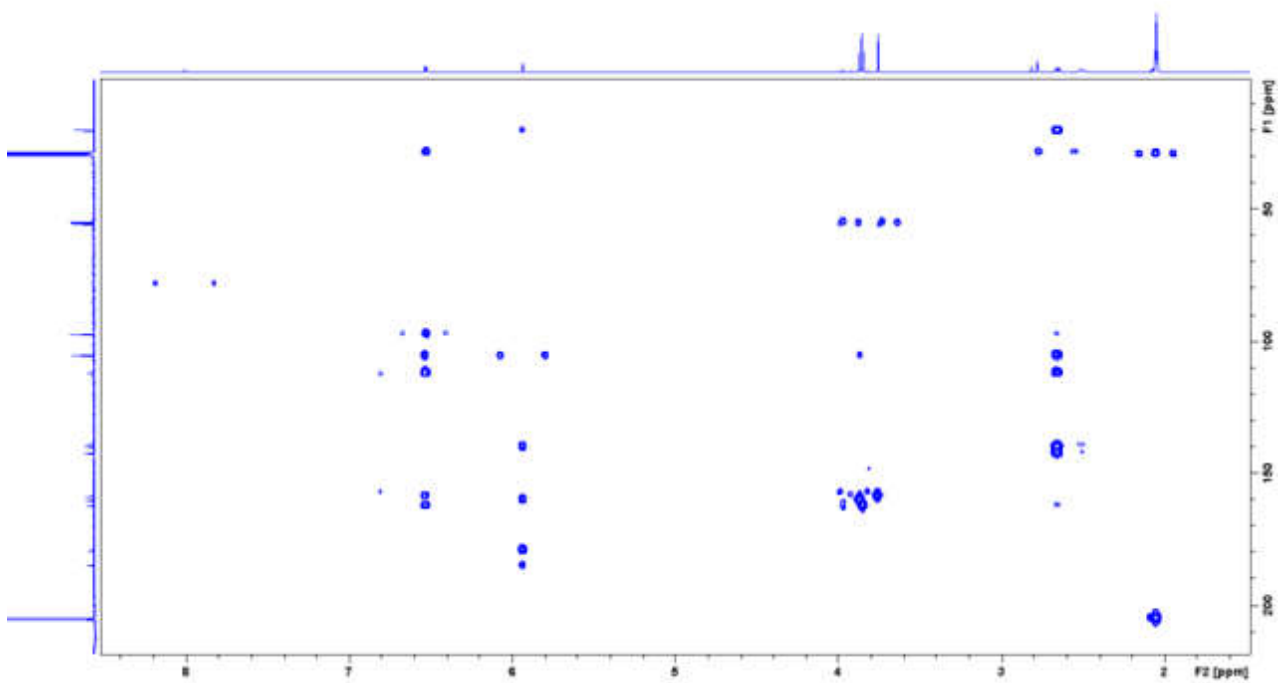

**Figure S6.** HMBC 2D NMR spectrum (600 MHz) of compound 5 in  $C_3D_6O$ .

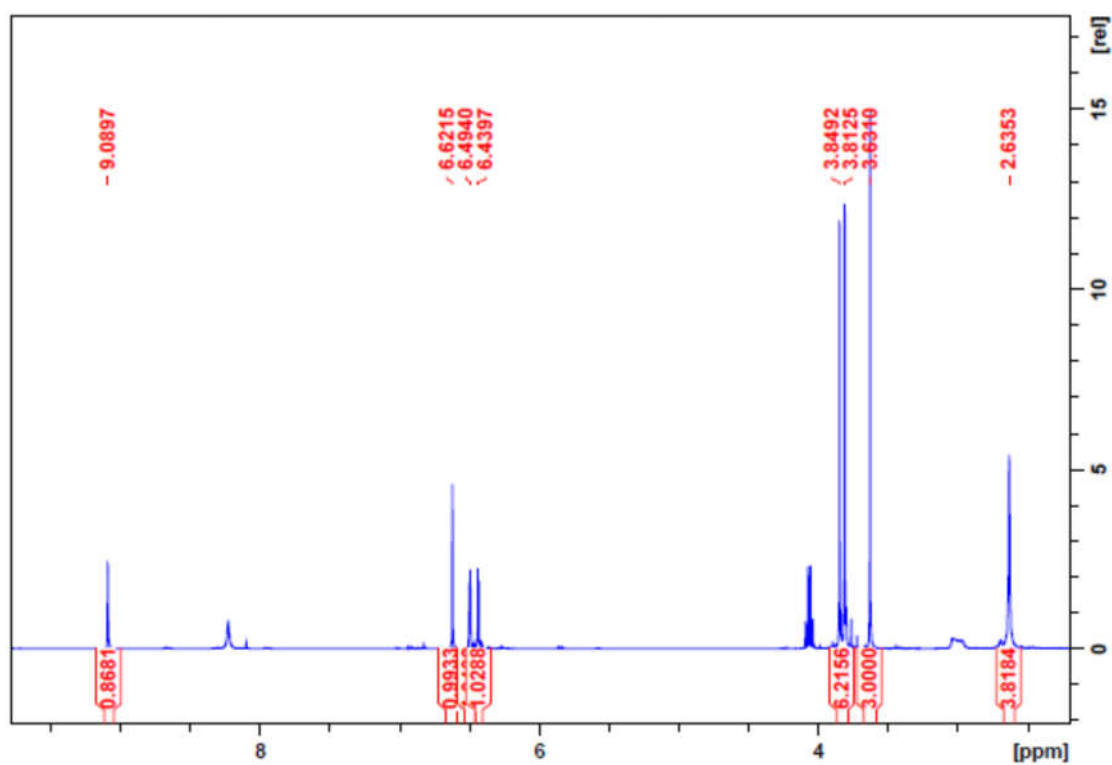

Figure S7. <sup>1</sup>H NMR spectrum (400 MHz) of compound 9 in C<sub>3</sub>D<sub>6</sub>O.

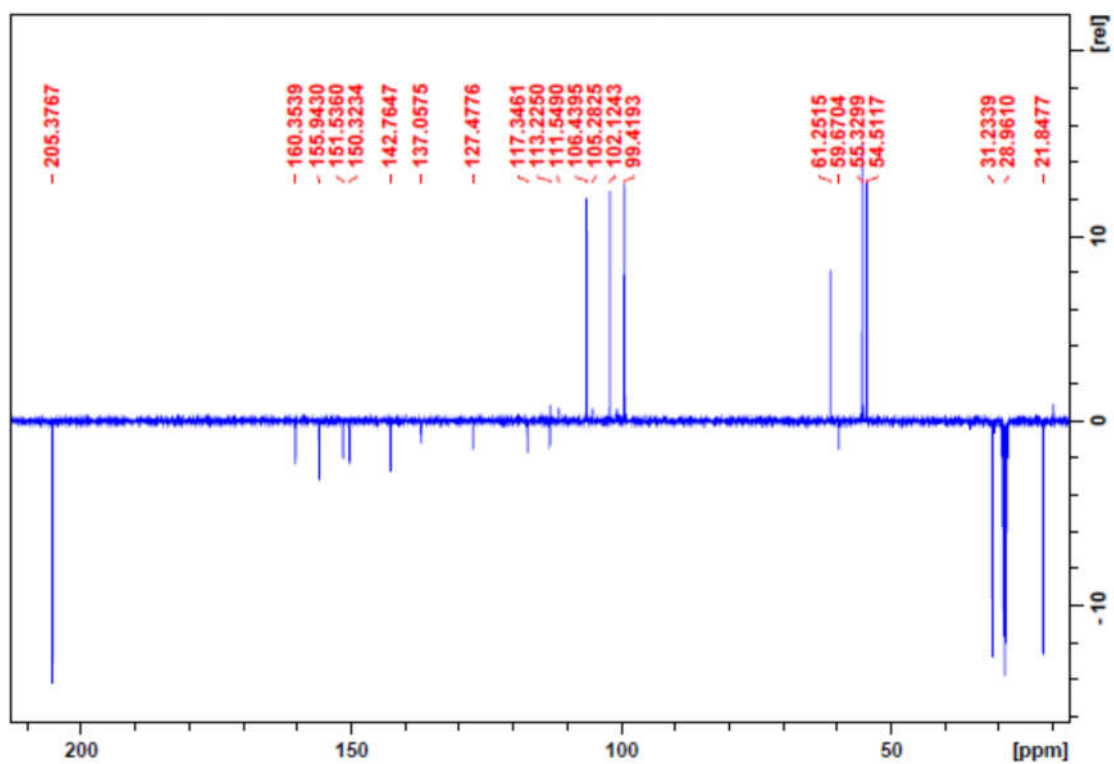

Figure S8. <sup>13</sup>C NMR spectrum (100 MHz) of compound 9 in C<sub>3</sub>D<sub>6</sub>O.

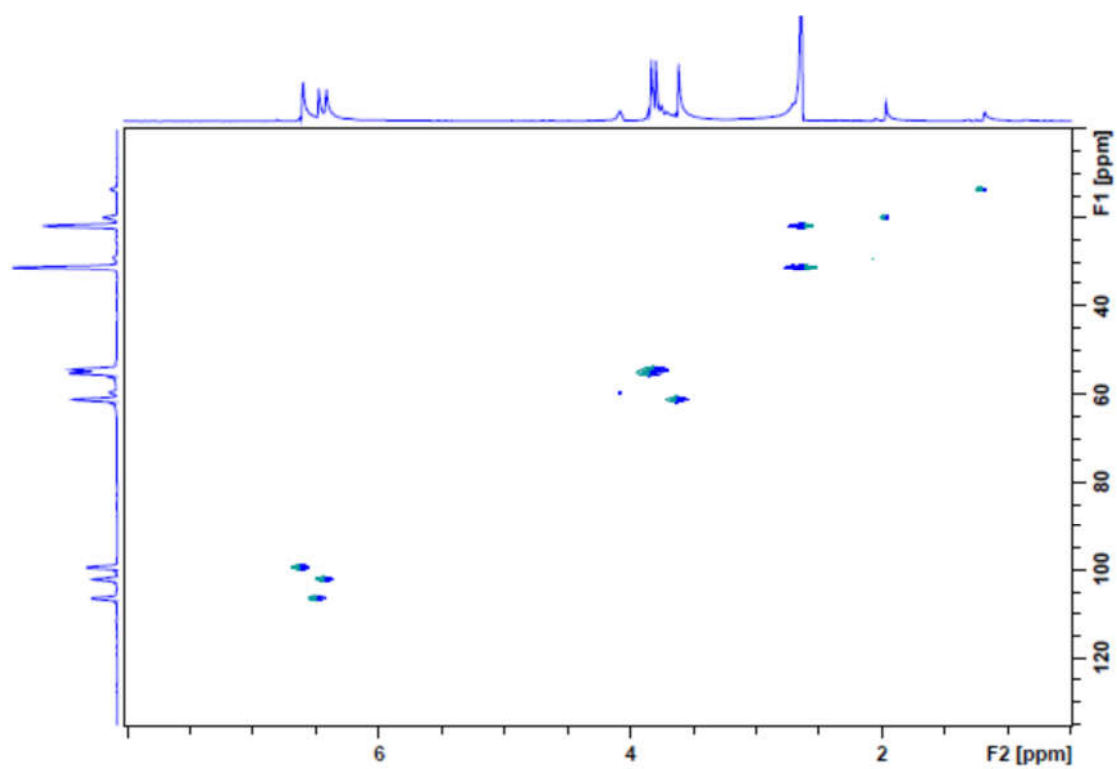

**Figure S9.** HSQC 2D NMR spectrum (400 MHz) of compound 9 in  $C_3D_6O$ .

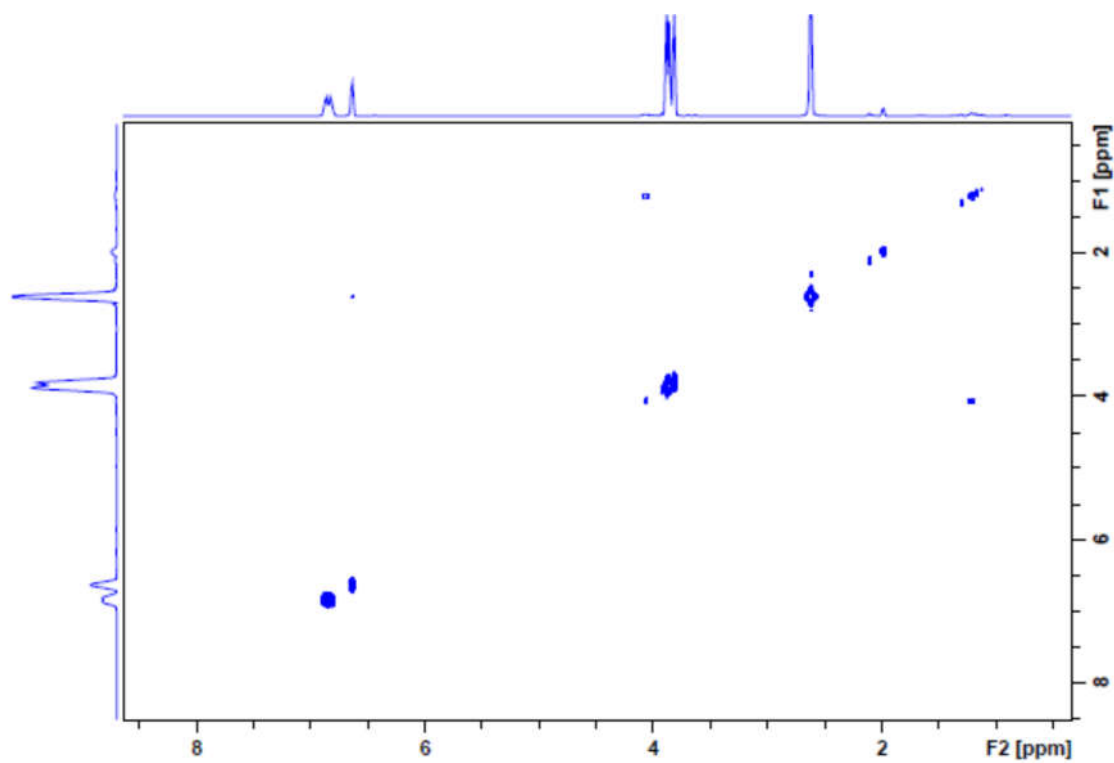

**Figure S10.** COSY 2D NMR spectrum (400 MHz) of compound 9 in  $C_3D_6O$ .

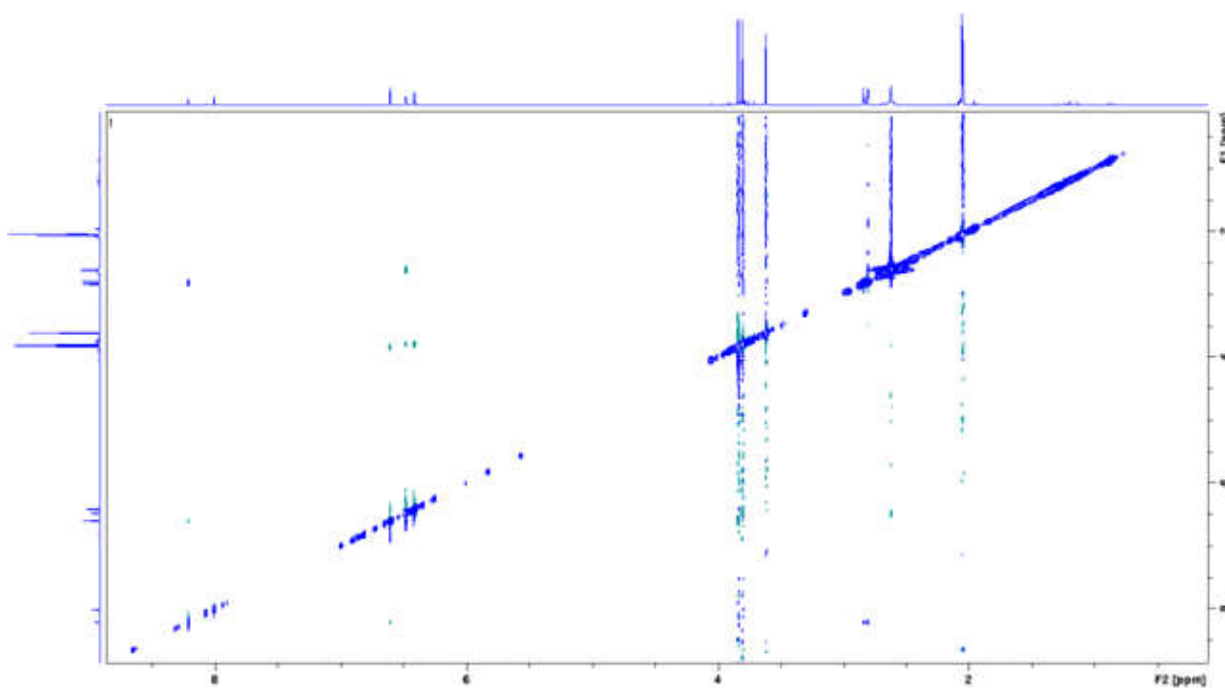

**Figure S11.** NOESY 2D NMR spectrum (600 MHz) of compound 9 in  $C_3D_6O$ .

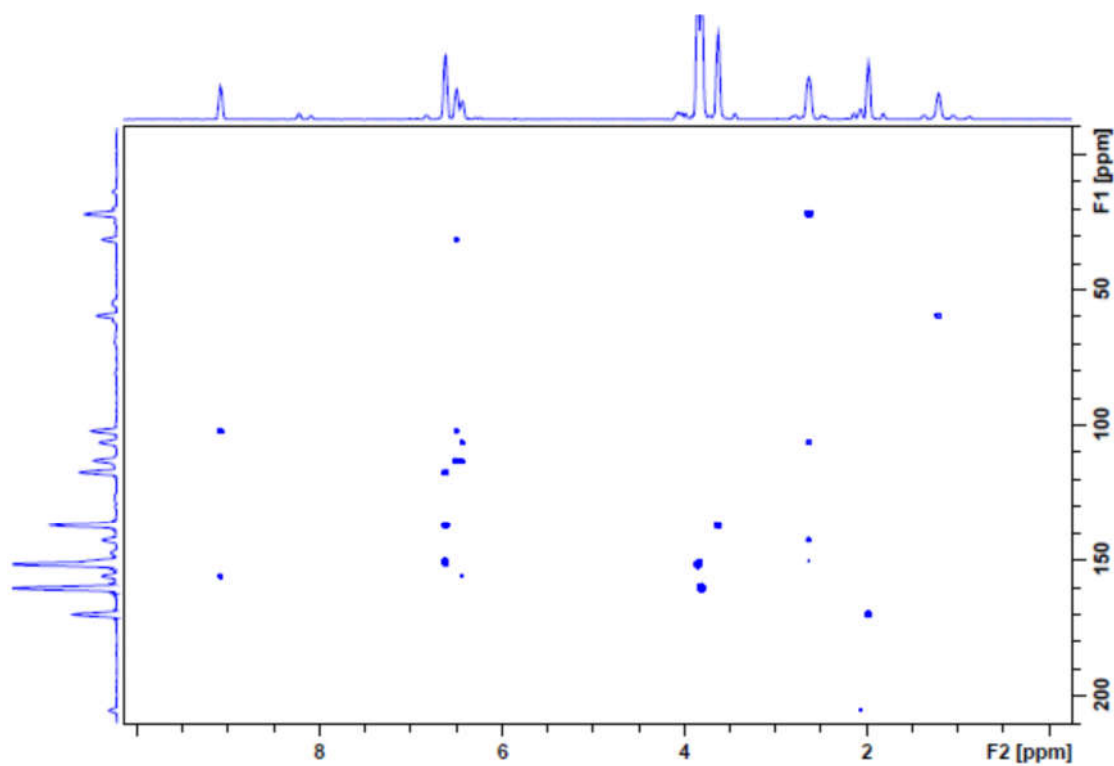

**Figure S12.** HMBC 2D NMR spectrum (400 MHz) of compound 9 in  $C_3D_6O$ .

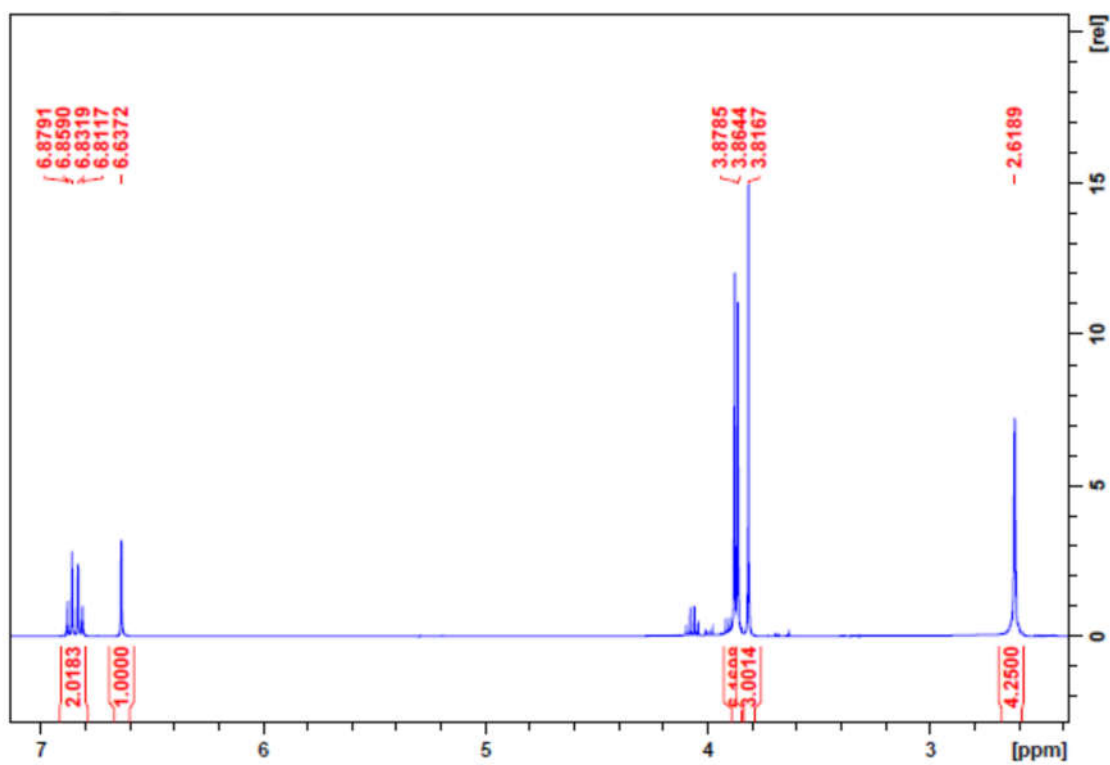

Figure S13.  $^1\text{H}$  NMR spectrum (400 MHz) of compound 10 in  $\text{C}_3\text{D}_6\text{O}$ .

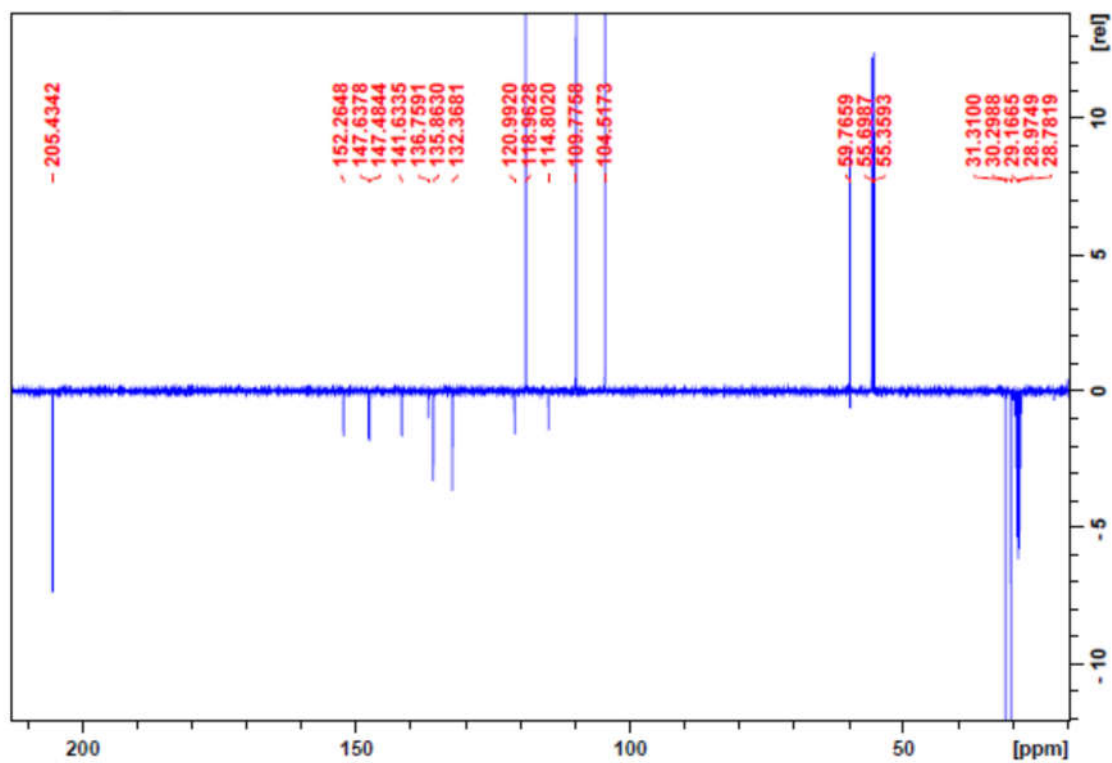

Figure S14.  $^{13}\text{C}$  NMR spectrum (100MHz) of compound 10 in  $\text{C}_3\text{D}_6\text{O}$ .



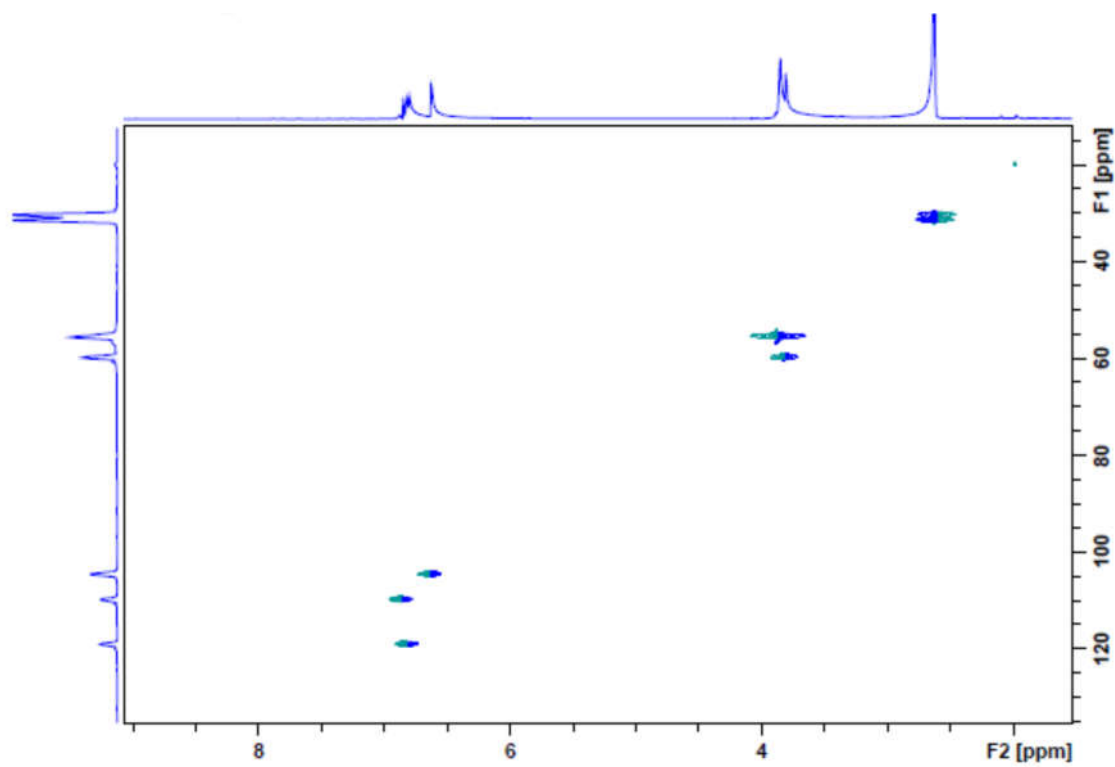

**Figure S15.** HSQC 2D NMR spectrum (400 MHz) of compound 10 in C<sub>3</sub>D<sub>6</sub>O.

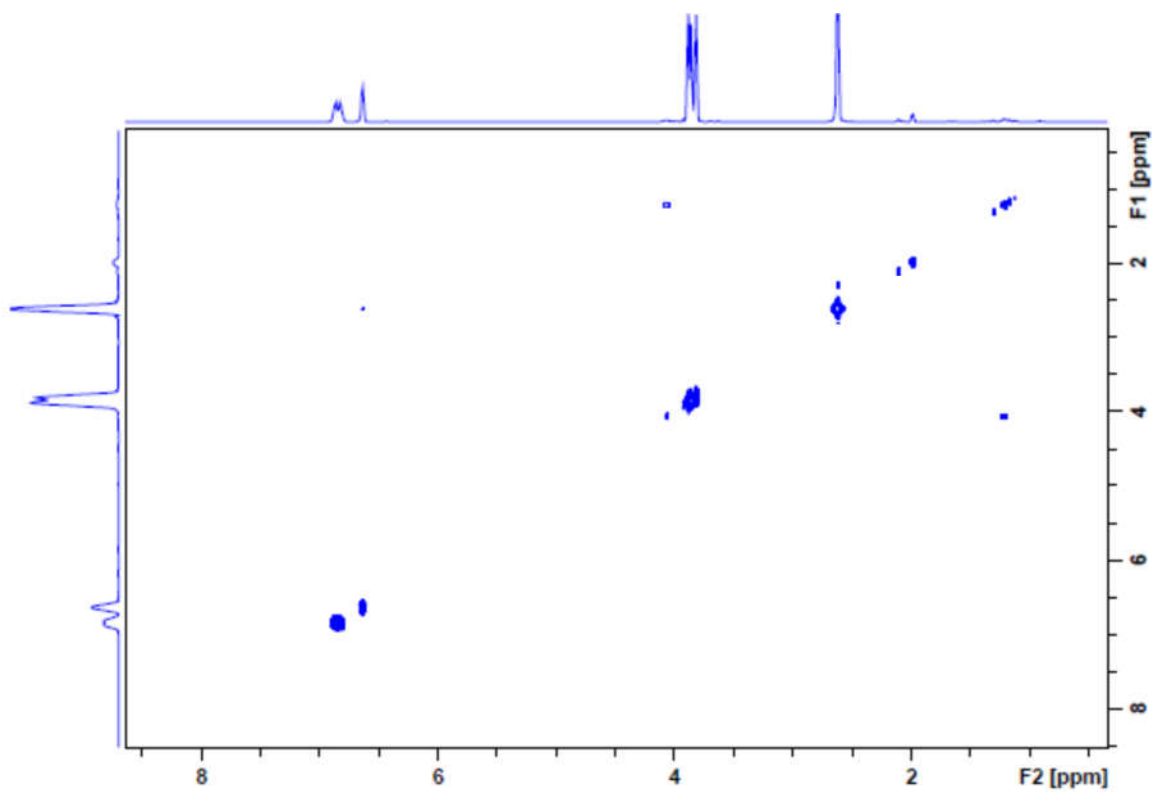

**Figure S16.** COSY 2D NMR spectrum (400 MHz) of compound 10 in C<sub>3</sub>D<sub>6</sub>O.

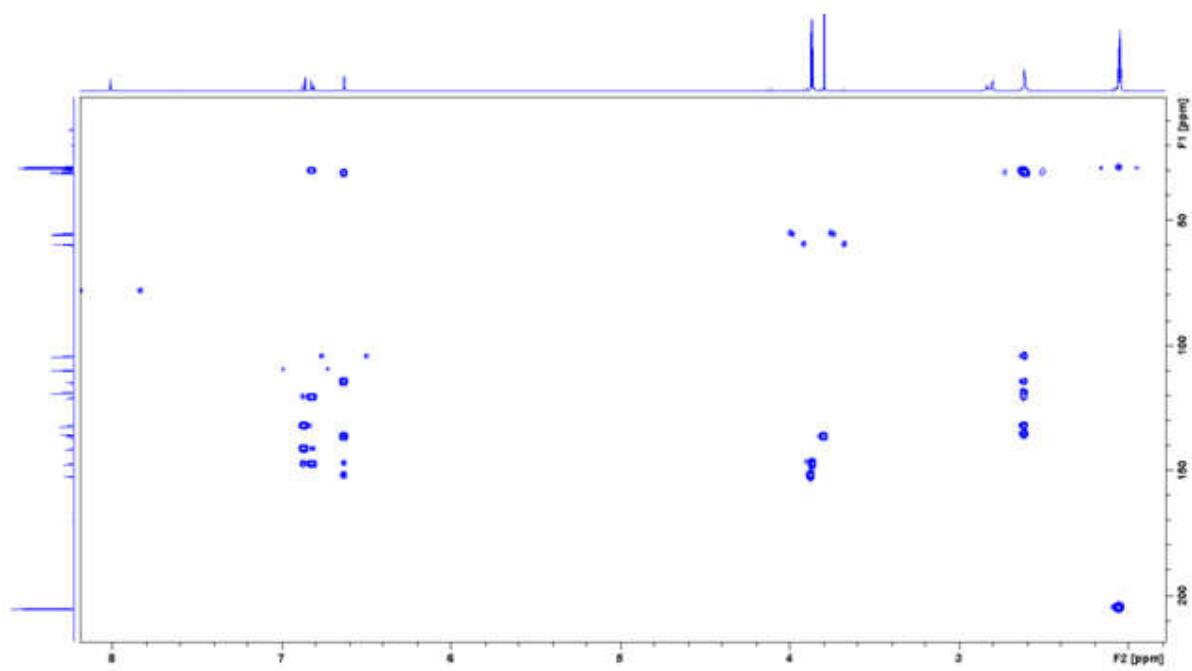

**Figure S17.** HMBC 2D NMR spectrum (600 MHz) of compound 10 in  $C_3D_6O$ .
